# Supplementary material for: Quantitative detection of hydroxyl radicals in Fenton system by UV-vis spectrophotometry
Source: Royal Society of Chemistry journal article supplement (doi:10.1039/c5ay00514k), 2015-01-01
Supplement: c5ay00514k1.pdf [file c5ay00514k1.pdf]

**Supplementary Information for**  
**Quantitative detection of hydroxyl radicals in Fenton system by UV-Vis**  
**spectrophotometry**

**Haiqian Zhao,<sup>a,b</sup> Jihui Gao,<sup>\*a</sup> Wei Zhou,<sup>a</sup> Zhonghua Wang<sup>b</sup> and Shaohua Wu<sup>a</sup>**

<sup>a</sup> School of Energy Science and Technology, Harbin Institute of Technology, Harbin, 150001, China.

<sup>b</sup> School of Civil Engineering & Architecture, Northeast Petroleum University, Daqing, 163318, China.

Corresponding authors

Jihui Gao

Tel: +86 451 8641 3231

Fax: +86 451 8641 2528

Email-address: [gaojh@hit.edu.cn](mailto:gaojh@hit.edu.cn)

In these experiments, the expected concentration of MSIA was 100mM, and FBBs/MSIA=50.  $\text{FeSO}_4 \cdot 7\text{H}_2\text{O}$  and the cations or anions was added before extraction, and the concentration of  $\text{FeSO}_4$  in the systems was 200mM. The extraction time was 300s.  $\text{Fe}_2(\text{SO}_4)_3$ ,  $\text{Na}_2\text{SO}_4$ ,  $\text{K}_2\text{SO}_4$  were adopted to examine the influence of  $\text{Fe}^{3+}$ ,  $\text{Na}^+$ ,  $\text{K}^+$  on the test, and  $\text{Fe}(\text{NO}_3)_2$ ,  $\text{FeCl}_2$  were adopted to examine the influence of  $\text{NO}_3^-$ ,  $\text{Cl}^-$  on the test. However, high concentration of  $\text{Fe}_2(\text{SO}_4)_3$  made the solution muddy,  $\text{Fe}(\text{NO}_3)_3$  was used to instead of  $\text{Fe}_2(\text{SO}_4)_3$  when we examined the influence of  $\text{Fe}^{3+}$  at the concentration of 20mM. The influence of  $\text{NO}_3^-$ ,  $\text{Cl}^-$  on the test is shown in Fig. S1 and the influence of on the test is shown in Fig. S2.

It can be seen from Fig. S1 that  $\text{NO}_3^-$  does not have an obvious influence on the test result of diazosulfones, even though the concentration of  $\text{NO}_3^-$  is 20mM.  $\text{Cl}^-$  does not have an obvious influence on the test when the concentration of  $\text{Cl}^-$  is low(500 $\mu\text{M}$ ), however, the absorbance of diazosulfones(425nm) disappears when the concentration of  $\text{Cl}^-$  is 20mM. Consequently, the modified method is not appropriate for the system contains high concentration of  $\text{Cl}^-$ .

From Fig. S2, it can be seen that  $\text{Na}^+$  and  $\text{K}^+$  do not affect the test result of diazosulfones obviously, even though the concentrations of  $\text{Na}^+$  and  $\text{K}^+$  are 20mM. Low concentration of  $\text{Fe}^{3+}$  does not have an obvious influence on the test, however, high concentration of  $\text{Fe}^{3+}$  leads to the increase of extraction time, and the absorption peak keeps 425nm. The absorbance of diazosulfones with extracting 480s after adding 20mM of  $\text{Fe}^{3+}$  is the same as that with extracting 300s before adding  $\text{Fe}^{3+}$ . When we tested  $\cdot\text{OH}$  concentration in Fenton system, the concentration of  $\text{Fe}^{3+}$  was equal to that of  $\cdot\text{OH}$ . After the addition of 20.00mL of  $\text{H}_2\text{O}_2$ (250 $\mu\text{M}$ ) in to 80.00mL of  $\text{Fe}^{2+}$ /DMSO solution, the final concentrations of  $\text{Fe}^{3+}$  were expected to be 50.0 $\mu\text{M}$ . under this circumstance,  $\text{Fe}^{3+}$  did not have an obvious influence on the test.

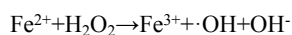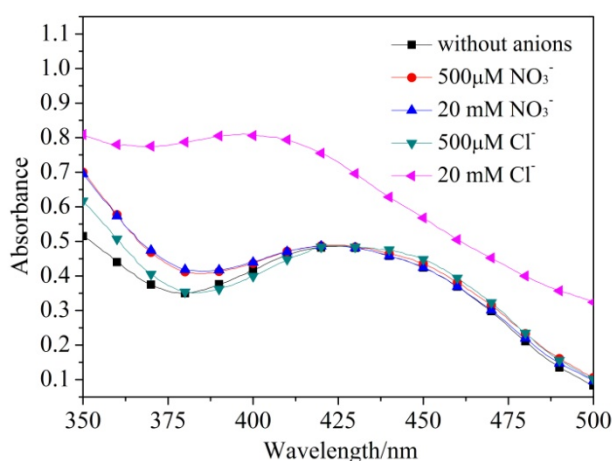

Fig. S1 Influence of  $\text{NO}_3^-$ ,  $\text{Cl}^-$  on the test

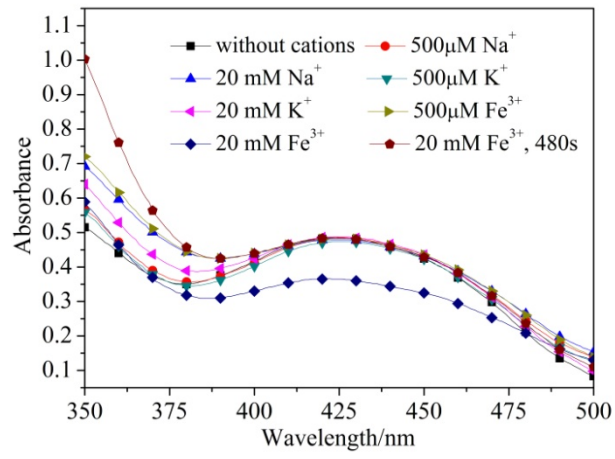

Fig. S2 Influence of Fe<sup>3+</sup>, Na<sup>+</sup>, K<sup>+</sup> on the test
